# Supplementary material for: Further Insights on RNA Expression and Sperm Motility
Source: MDPI journal article supplement (doi:10.3390/genes13071291), 2022-07-21
Supplement: s1 [file s1]

**Supplementary Table S1.** List of primers used to study mRNAs

| Primer     | Transcript     | Sequence                  | Positive control | TA      |
|------------|----------------|---------------------------|------------------|---------|
| ZMYND10-F  | NM_015896.4    | TGGAGCGAGAAAACAGAGGC      | Ciliated cells   | 60°C    |
| ZMYND10-R  |                | ATTCTGGCATCGTGAGCAGC      |                  |         |
| TEKT2-F    | NM_014466.3    | AACCATCGCTGCCCTGAAG       | Ciliated cells   | 58°C    |
| TEKT2-R    |                | CATGGAGTTGGCCTTGACAG      |                  |         |
| SPATA33-F  | NM_001271907.2 | CTGATGTAAAGCAAAAGTCCAGC   | PBMC             | 60°C    |
| SPATA33-R  |                | GGAAGTGCAGTACTAGCG        |                  |         |
| RSPH6A-F   | NM_030785.4    | CGTGAACGCCCCGAAAGATC      | Testis           | 60°C    |
| RSPH6A-R   |                | CGCCCTCCTCCTCACTAAAC      |                  |         |
| CATSPER3-F | NM_178019.3    | TCTCAACACCGTCACCAGC       | Testis           | 60°C    |
| CATSPER3-R |                | GCATTGATGTGACAGTGC        |                  |         |
| CATSPER2-F | NM_172095.4    | CCCTCAAGAGCATGACCTTCC     | PBMC             | 58/60°C |
| CATSPER2-R |                | ACTCTGAGAAGACGTAGACACC    |                  |         |
| BSCL2-F    | NM_001122955.4 | TCCCTGTTGCCAATGTCTCG      | Ciliated cells   | 60°C    |
| BSCL2-R    |                | AGAAGTGGAGATGATTGCGCC     |                  |         |
| IQCG-F     | NM_032263.5    | ATCCCGGAAACTCTAGAGCC      | Ciliated cells   | 59°C    |
| IQCG-R     |                | TGATTGTTGAGGCCATTGGAAG    |                  |         |
| CFAP43-F   | NM_025145.7    | AAACGCCGACCAAGGATTTC      | Ciliated cells   | 60°C    |
| CFAP43-R   |                | AGATCCTGGTAGTTCTCCGAAAG   |                  |         |
| PLAG1-F    | NM_002655.3    | CAACAAGACTGCACCAAGGC      | PBMC             | 59°C    |
| PLAG1-R    |                | AGTTCCTGCCACATTCTTCGC     |                  |         |
| CFAP44-F   | NM_001164496.2 | GCCTTGGACTGCTCTGTTCG      | Ciliated cells   | 58°C    |
| CFAP44-R   |                | GCTCCAGTGAAGTTTACCATTTCG  |                  |         |
| QRICH2-F   | NM_001388453.1 | CCATCAGGTCAGCACGCT        | Testis           | 60°C    |
| QRICH2-R   |                | TGCTGGTGGTGATGTTGAGC      |                  |         |
| TTC21A-F   | NM_001366900.1 | CATGAAACTGGACAAGGATGGC    | Ciliated cells   | 60°C    |
| TTC21A-R   |                | CCTTGATGCTGGAGAAGTGAAG    |                  |         |
| KRT34-F    | NM_021013      | GCTGACGGAGAGCGAGGCCAC     | Ciliated cells   | 62°C    |
| KRT34-R    |                | CCGGGCACGCACGTCCAGCA      |                  |         |
| CRHR1-F    | NM_001145146   | AGCACGCATGTCCCTCCAAGGCTGT | Ciliated cells   | 62°C    |
| CRHR1-R    |                | TCACGAGTTGCCCATGATGCCCCA  |                  |         |
| LRRC6-F    | NM_012472.6    | GCCATGGGCTGGATCAC         | Ciliated cells   | 60°C    |
| LRRC6-R    |                | TGCTGATGCAACGAGAGTTC      |                  |         |
| HIP1-F     | NM_005338.7    | CATGAGAAAGGGGCACAGAC      | PBMC             | 59°C    |
| HIP1-R     |                | TTCAGGTAGATGCTGCACAG      |                  |         |
| CCDC40-F   | NM_017950.4    | TTAGGCCCCGTCGGAGCAAATGG   | Ciliated cells   | 60°C    |
| CCDC40-R   |                | ACTGGCTCCTGCGAGACGAACT    |                  |         |

TA- annealing temperature

**Supplementary Table S1 (continuation).** List of primers used to study mRNAs

| Primer  | Transcript     | Sequence             | Positive control | TA        |
|---------|----------------|----------------------|------------------|-----------|
| DRC1-F  | NM_145038.5    | GAGCCTTTGATGTGGACAG  | Ciliated cells   | 60°C      |
| DRC1-R  |                | TCTGTGTGGCGGACTTCTG  |                  |           |
| USP11-F | NM_004651.3    | CCGCAAGCCAGAGCAGCACC | Ciliated cells   | 60°C      |
| USP11-R |                | TGCGCTCCCGCAGGTAGACA |                  |           |
| GAPDH-F | NM_001289745.2 | AGGTCGGAGTCAACGGATT  | -                | 58°C/60°C |
| GAPDH-R |                | TGGAATTTGCCATGGGTGGA |                  |           |
| B2M -F  | NM_004048      | TGGGTTTCATCCATCCGACA | -                | 58°C/60°C |
| B2M -R  |                | ACGGCAGGCATACTCATCTT |                  |           |

TA- annealing temperature

**Supplementary Table S2.** List of the mRNA highest score corresponding target microRNA

| mRNA     | Highest score corresponding target microRNA |
|----------|---------------------------------------------|
| QRICH2   | -                                           |
| LRRC6    | miR-3664-5p                                 |
| RSPH6A   | miR-2110                                    |
| KRT34    | -                                           |
| CRHR1    | -                                           |
| TEKT2    | miR-4660                                    |
| CATSPER3 | miR-492                                     |
| CFAP44   | miR-4425                                    |
| HIP1     | miR-4731                                    |
| IQCG     | miR-4514                                    |
| SPATA33  | miR-518c-5p                                 |

**Supplementary Table S3.** List of the primers used for the selected microRNAs

| Primer        | Sequence                  | Length (BP) |
|---------------|---------------------------|-------------|
| miR-4660-F    | GCAGCTCTGGTGGAAAATG       | 19          |
| miR-4660-R    | GGTCCAGTTTTTTTTTTTTTCTC   | 25          |
| miR-518c-5p-F | TCTCTGGAGGGAAGCAC         | 17          |
| miR-518c-5p-R | GTCCAGTTTTTTTTTTTCAGAAAG  | 28          |
| miR-2110-F    | GGAAACGGCCGCTGA           | 15          |
| miR-2110-R    | GGTCCAGTTTTTTTTTTTCACT    | 26          |
| miR-492-F     | GACCTGCGGGACAAG           | 15          |
| miR-492-R     | GGTCCAGTTTTTTTTTTTAAGAATC | 29          |
| miR-4514-F    | GCAGACAGGCAGGATTG         | 17          |
| miR-4514-R    | GGTCCAGTTTTTTTTTTTCCC     | 25          |
| miR-4425-F    | CAGTGTTGGGATTCAGCAG       | 19          |
| miR-4425-R    | GGTCCAGTTTTTTTTTTTATGGT   | 27          |
| miR-572-F     | CCGCTCGGCGGT              | 12          |
| miR-572-R     | AGTTTTTTTTTTTGGGCA        | 23          |
| miR-3664-5p-F | GCAGAACTCTGTCTCACTCA      | 21          |
| miR-3664-5p-R | CAGGTCCAGTTTTTTTTTTTACT   | 27          |
| miR-4731-5p-F | TGGGGGCCACATGAG           | 15          |
| miR-4731-5p-R | GTCCAGTTTTTTTTTTTCACAC    | 26          |
